# Supplementary material
Source: PubMed Central journal article supplement (PMC5489255)
Supplement: NIHMS864252-supplement-Suppl_Table_1.pdf [file NIHMS864252-supplement-Suppl_Table_1.pdf]

**Supplementary Table 1.** Body weight, plasma AST, and lipid profiles of ApoE knockout mice treated with 8-OHdG and tempol

|                                   | <b>ApoE KO</b> | <b>ApoE KO + 8-OHdG</b> | <b>ApoE KO + tempol</b> |
|-----------------------------------|----------------|-------------------------|-------------------------|
| Body weight (before surgery), g   | 22.10 ± 0.49   | 22.45 ± 0.62            | 23.05 ± 0.58            |
| Body weight (before sacrifice), g | 22.70 ± 0.40   | 22.20 ± 0.51            | 22.93 ± 1.20            |
| AST (U/L)                         | 40.60 ± 7.46   | 32.00 ± 8.19            | 52.83 ± 9.99            |
| Triglyceride, mg/dL               | 191.2 ± 9.5    | 162.8 ± 5.9*            | 179.3 ± 13.0            |
| Total cholesterol, g/dL           | 2.3 ± 0.1      | 2.5 ± 0.1               | 2.4 ± 0.3               |
| Free fatty acid, μM               | 1.5 ± 0.2      | 1.6 ± 0.1               | 1.5 ± 0.1               |

Values are means ± SE. \*P<0.05 vs. ApoE KO.
