# Supplementary material
Source: PubMed Central journal article supplement (PMC5489255)

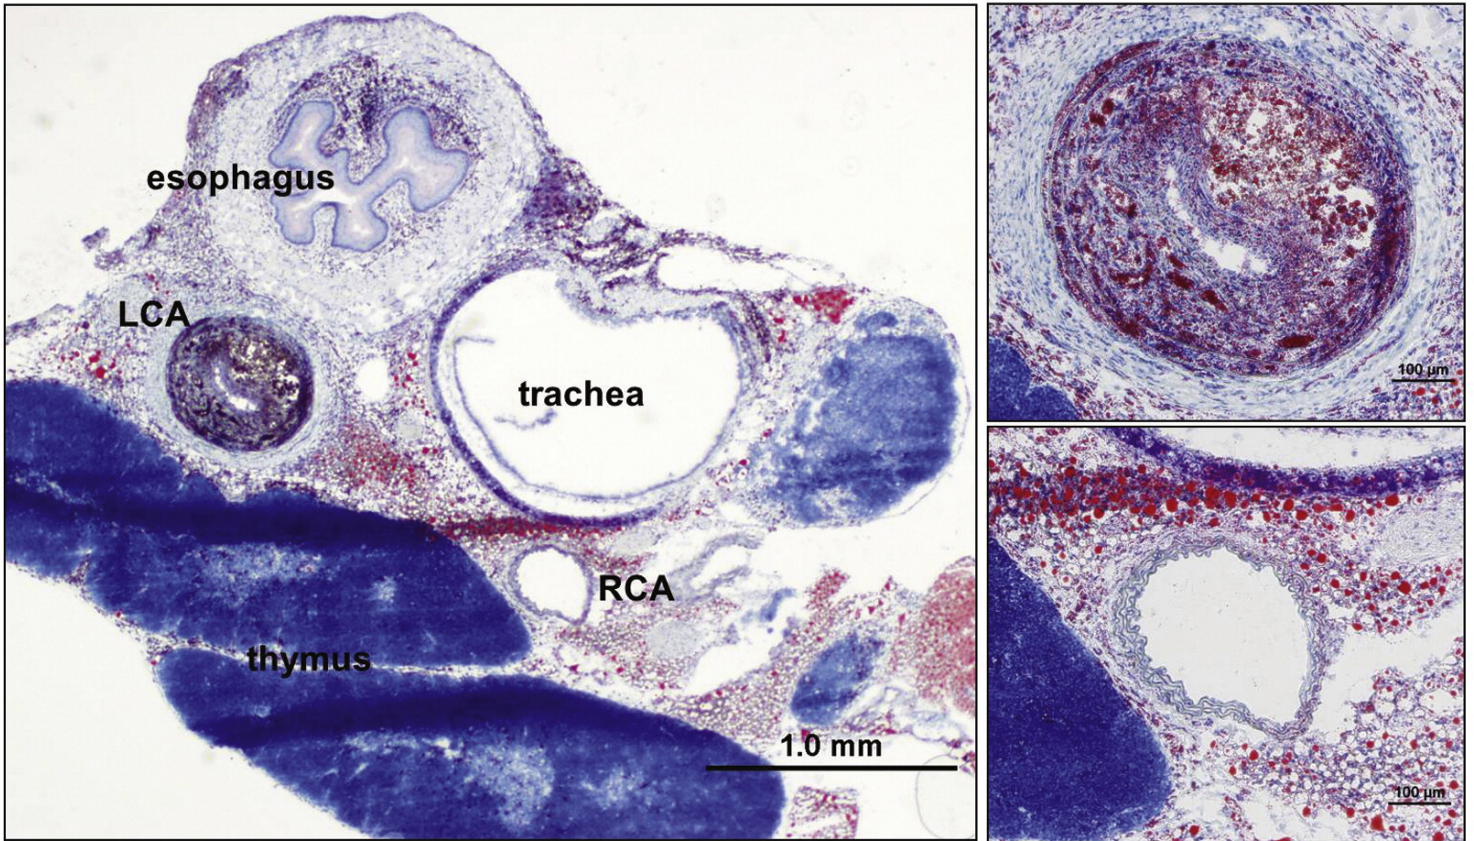

Supplement: NIHMS864252-supplement-Suppl_Figure_1.pdf [file NIHMS864252-supplement-Suppl_Figure_1.pdf]

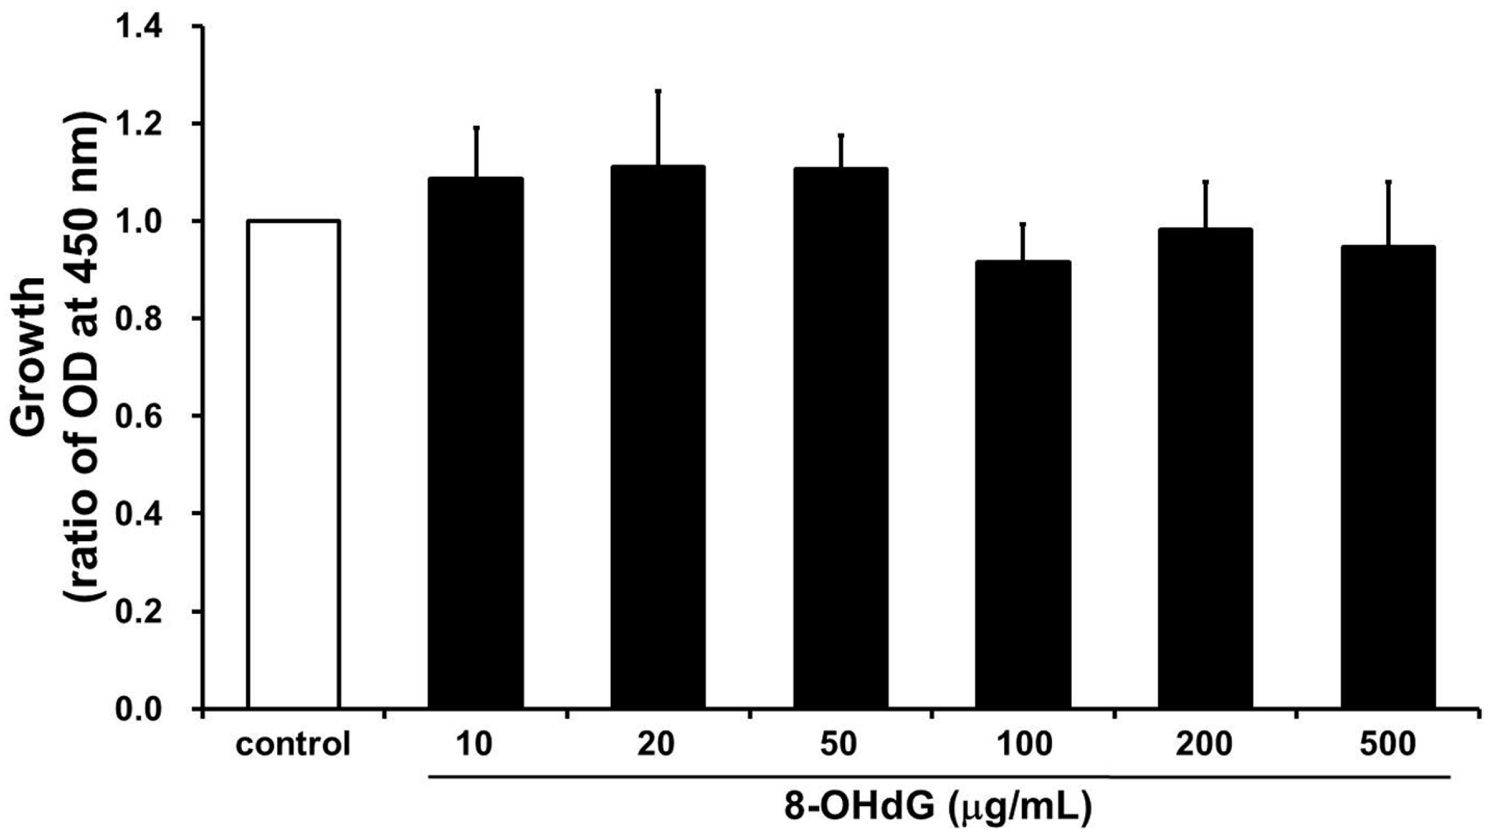

Supplement: NIHMS864252-supplement-Suppl_Figure_2.pdf [file NIHMS864252-supplement-Suppl_Figure_2.pdf]
